# Supplementary material for: Socioeconomic Disparities in Cancer Treatment, Service Utilization and Catastrophic Health Expenditure in China: A Cross-Sectional Analysis
Source: PubMed Central journal article supplement (PMC7068279; doi:10.3390/ijerph17041327), 2020-02-19
Supplement: ijerph-17-01327-s001.pdf [file ijerph-17-01327-s001.pdf]

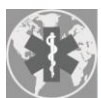

**Supplementary File**

**Table S1.** *The treatment status among Chinese adults with cancer in 2015, by sociodemographic groups.*

| Variables              | Chinese traditional medicine |         | Western modern medicine |         | Surgery therapy |         | Radiation or chemotherapy |         |
|------------------------|------------------------------|---------|-------------------------|---------|-----------------|---------|---------------------------|---------|
|                        | %                            | P value | %                       | P value | %               | P value | %                         | P value |
| Age (years)            |                              |         |                         |         |                 |         |                           |         |
| 45-60                  | 18.38                        | 0.998   | 31.89                   | 0.627   | 28.65           | 0.358   | 15.68                     | 0.341   |
| >=60                   | 18.37                        |         | 29.59                   |         | 24.49           |         | 19.39                     |         |
| Gender                 |                              |         |                         |         |                 |         |                           |         |
| Male                   | 23.33                        | 0.090   | 37.50                   | 0.051   | 32.50           | 0.072   | 25.83                     | 0.004   |
| Female                 | 16.09                        |         | 27.59                   |         | 23.75           |         | 13.79                     |         |
| Marital status         |                              |         |                         |         |                 |         |                           |         |
| Married/partnered      | 18.45                        | 0.913   | 31.85                   | 0.189   | 26.49           | 0.980   | 17.86                     | 0.703   |
| Never married/divorced | 17.78                        |         | 22.22                   |         | 26.67           |         | 15.56                     |         |
| Level of education     |                              |         |                         |         |                 |         |                           |         |
| Primary school/below   | 18.22                        | 0.902   | 31.60                   | 0.560   | 24.16           | 0.108   | 18.22                     | 0.616   |
| Middle school/above    | 18.75                        |         | 28.57                   |         | 32.14           |         | 16.07                     |         |
| Region                 |                              |         |                         |         |                 |         |                           |         |
| East                   | 17.09                        | 0.670   | 25.95                   | 0.061   | 25.95           | 0.438   | 18.99                     | 0.158   |
| Central                | 17.93                        |         | 30.34                   |         | 29.66           |         | 20.00                     |         |
| West                   | 21.79                        |         | 41.03                   |         | 21.79           |         | 10.26                     |         |
| Health insurance       |                              |         |                         |         |                 |         |                           |         |
| None                   | 14.63                        | 0.029   | 29.27                   | 0.050   | 24.39           | 0.206   | 19.51                     | 0.189   |
| NCMS                   | 14.22                        |         | 25.69                   |         | 23.39           |         | 14.22                     |         |
| URBBI/others           | 27.12                        |         | 38.98                   |         | 28.81           |         | 20.34                     |         |
| UEBBI                  | 26.98                        |         | 41.27                   |         | 36.51           |         | 25.40                     |         |
| Complication           |                              |         |                         |         |                 |         |                           |         |
| None                   | 14.93                        | 0.212   | 32.84                   | 0.296   | 23.88           | 0.019   | 17.91                     | 0.017   |
| 1-2                    | 22.96                        |         | 33.33                   |         | 34.81           |         | 23.70                     |         |
| 3 and above            | 16.96                        |         | 25.00                   |         | 19.64           |         | 9.82                      |         |
| Total                  | 18.37                        | -       | 30.71                   | -       | 26.51           | -       | 17.59                     | -       |

**Note:** UEBMI, Urban Employee Basic Medical Insurance; URBBI, Urban Resident Basic Medical Insurance; NCMS, New Rural Cooperative Medical Scheme; Others, government healthcare, private medical insurance and so on; PCE, Per capita household annual consumption expenditure.

**Table S2.** Health service utilization and catastrophic health expenditure among Chinese adults with cancer, 2015.

| Variables              | Outpatient visit |         | Inpatient visit |         | Catastrophic health expenditure |         |
|------------------------|------------------|---------|-----------------|---------|---------------------------------|---------|
|                        | %                | P value | %               | P value | %                               | P value |
| Age (years)            |                  |         |                 |         |                                 |         |
| 45-60                  | 30.39            | 0.725   | 23.50           | 0.008   | 28.66                           | 0.110   |
| ≥60                    | 32.09            |         | 36.08           |         | 37.16                           |         |
| Gender                 |                  |         |                 |         |                                 |         |
| Male                   | 28.70            | 0.476   | 38.66           | 0.012   | 37.23                           | 0.261   |
| Female                 | 32.41            |         | 25.97           |         | 30.73                           |         |
| Marital status         |                  |         |                 |         |                                 |         |
| Married/partnered      | 30.25            | 0.260   | 30.12           | 0.866   | 32.86                           | 0.842   |
| Never married/divorced | 38.64            |         | 28.89           |         | 31.03                           |         |
| Level of education     |                  |         |                 |         |                                 |         |
| Primary school/below   | 31.27            | 0.988   | 31.20           | 0.420   | 35.16                           | 0.154   |
| Middle school/above    | 31.19            |         | 27.03           |         | 26.88                           |         |
| Region                 |                  |         |                 |         |                                 |         |
| East                   | 31.82            | 0.479   | 28.03           | 0.222   | 26.56                           | 0.133   |
| Central                | 28.06            |         | 34.97           |         | 35.54                           |         |
| West                   | 36.00            |         | 24.68           |         | 39.68                           |         |
| Health insurance       |                  |         |                 |         |                                 |         |
| None                   | 39.47            | 0.124   | 17.95           | 0.010   | 27.27                           | 0.054   |
| NCMS                   | 34.27            |         | 30.41           |         | 37.50                           |         |
| URBMI/others           | 22.41            |         | 20.69           |         | 34.62                           |         |
| UEBMI                  | 23.73            |         | 44.44           |         | 17.65                           |         |
| Complication           |                  |         |                 |         |                                 |         |
| None                   | 28.24            | 0.024   | 25.95           | 0.275   | 30.77                           | 0.529   |
| 1-2                    | 25.95            |         | 34.81           |         | 30.77                           |         |
| 3 and above            | 41.51            |         | 28.83           |         | 37.36                           |         |
| Total                  | 31.25            | -       | 29.97           | -       | 32.69                           |         |

**Note:** UEBMI, Urban Employee Basic Medical Insurance; URBMI, Urban Resident Basic Medical Insurance; NCMS, New Rural Cooperative Medical Scheme; Others, government healthcare, private medical insurance and so on; PCE, Per capita household annual consumption expenditure.

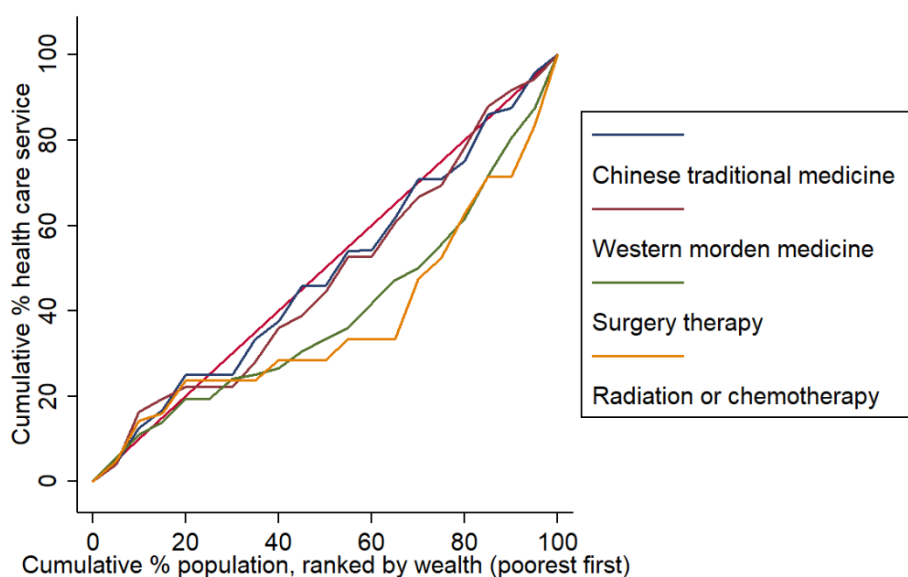

Figure S1a. Concentration curves of treatments for Chinese patients in urban areas in 2015.

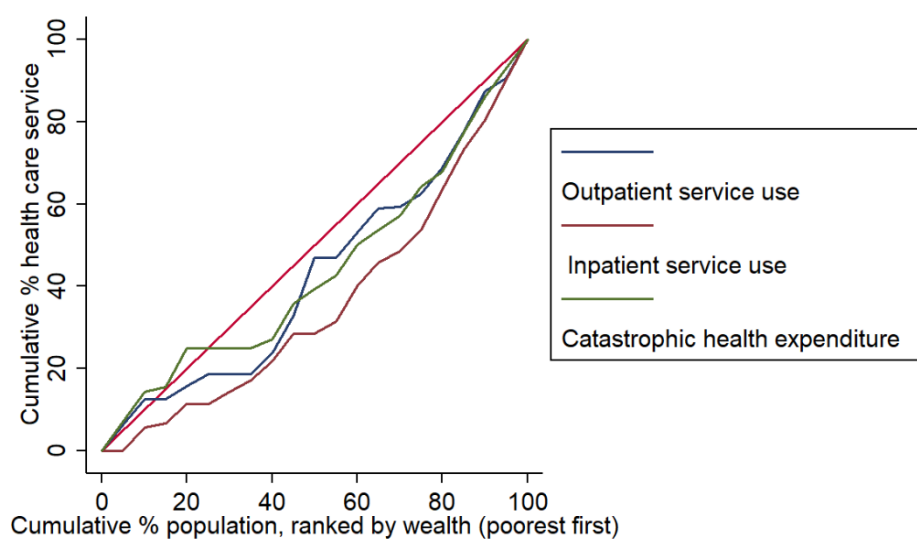

Figure S1b. Concentration curves of health service use and expenditure for Chinese patients in urban areas in 2015.

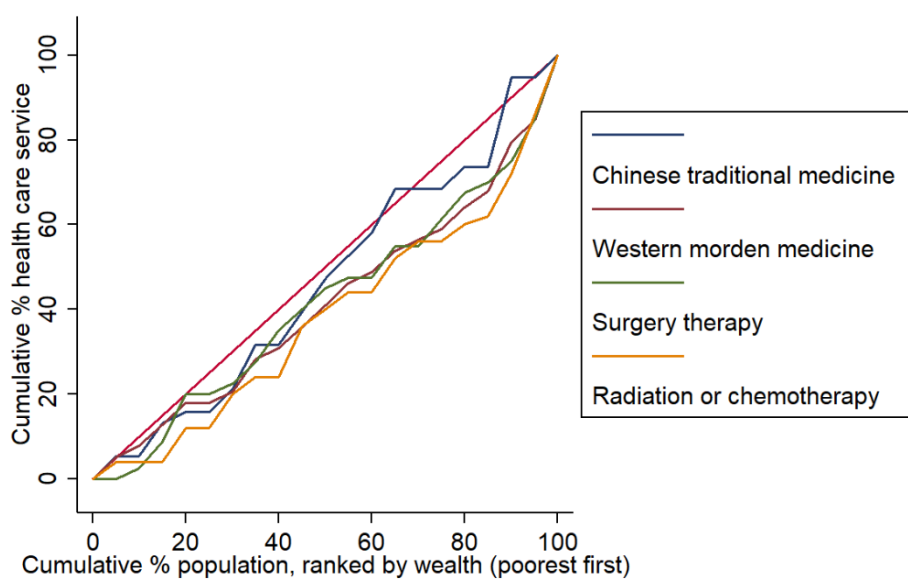

Figure S2a. Concentration curves of treatments for Chinese patients in rural areas in 2015.

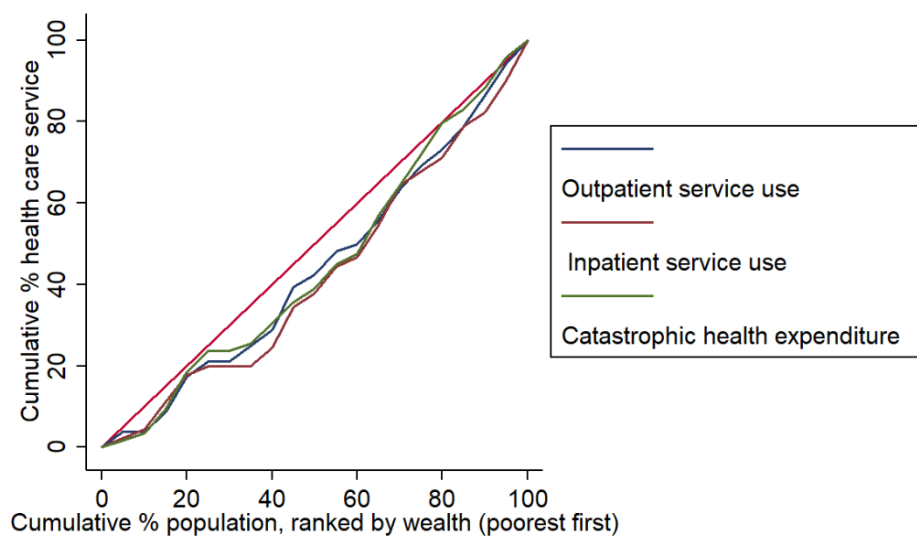

Figure S2b. Concentration curves of health service use and expenditure for Chinese patients in rural areas in 2015.
